# Supplementary material for: Electrophoretic deposition of chitosan/gelatin coatings with controlled porous surface topography to enhance initial osteoblast adhesive responses
Source: Royal Society of Chemistry journal article supplement (doi:10.1039/c6tb02122k), 2016-01-01
Supplement: c6tb02122k1.pdf [file c6tb02122k1.pdf]

## Supporting information

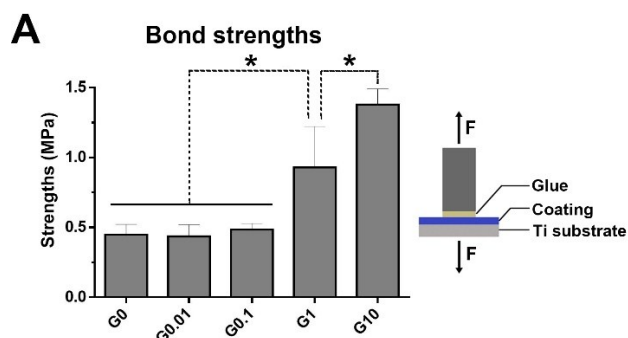

**Figure S1.** Bond strength of coatings.

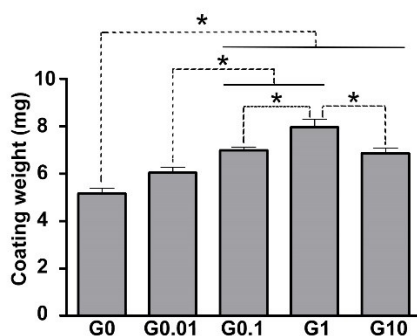

**Figure S2.** Weight gain of CS/G coatings by the EPD process with varying gelatin concentration.

Asterisk (\*) denoting significant differences ( $p < 0.05$ )

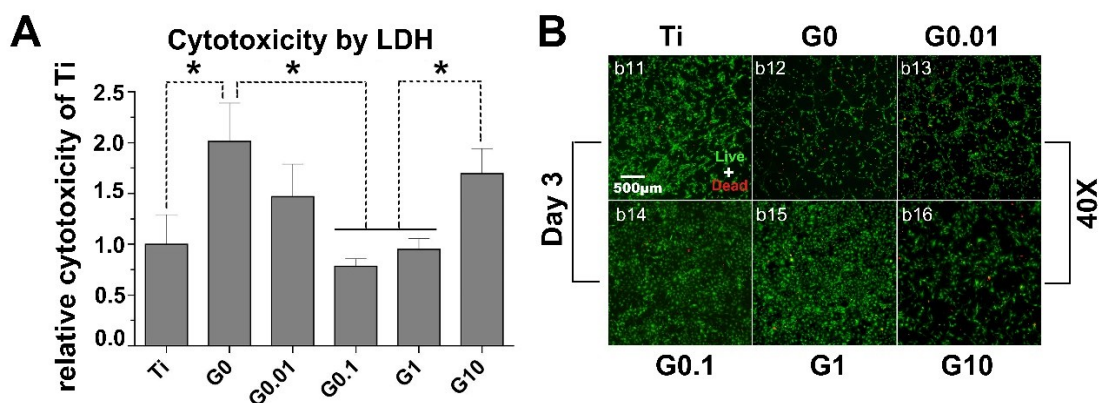

**Figure S3.** Cytotoxicity of coatings. A. Cytotoxicity measured by LDH assay kit at 3 days. B.

Representative Fluorescence images of live (green)/dead cells (red) on different coatings at 3 days.

Asterisk (\*) denoting significant differences ( $p < 0.05$ ).
